# Supplementary material for: Insights from Spatial Measures of Intolerance to Identifying Pathogenic Variants in Developmental and Epileptic Encephalopathies
Source: MDPI journal article supplement (doi:10.3390/ijms24065114), 2023-03-07
Supplement: s1 [file s1]

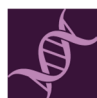

*Supplementary Materials*

# Insights from spatial measures of intolerance to identify pathogenic variants in developmental and epileptic encephalopathies

Michael Silk <sup>2, 3, 4</sup>, Alex de Sá <sup>1, 2, 3, 4</sup>, Moshe Olshansky <sup>2, 3, 4</sup> and David Ascher <sup>1, 2, 3, 4, \*</sup>

<sup>1</sup> School of Chemistry and Molecular Biosciences, University of Queensland, Brisbane City, Queensland, 4072, Australia

<sup>2</sup> Systems and Computational Biology, Bio21 Institute, University of Melbourne, Parkville, Victoria, 3052, Australia

<sup>3</sup> Computational Biology and Clinical Informatics, Baker Heart and Diabetes Institute, Melbourne, Victoria, 3004, Australia

<sup>4</sup> Baker Department of Cardiometabolic Health, University of Melbourne, Parkville, Victoria, 3010, Australia

\* **Correspondence:** d.ascher@uq.edu.au ; Tel.: +61-7-336-53891

**Supplementary Table S1: The description of the groups**

| Group | Purpose       | Number of Variants                                                                                                                    |
|-------|---------------|---------------------------------------------------------------------------------------------------------------------------------------|
| 1     | Control Group | 276 <i>de novo</i> variants derived from epilepsy patients (Epi4K);<br>454 <i>de novo</i> variants not derived from epilepsy patients |
| 2     | Control Group | 726 variants from autism spectrum disorders                                                                                           |
| 3     | Comparison    | 1,082,844 variants from DEE group (Epi25K);<br>2,134,301 variants from general population (DiscovEHR)                                 |

**Supplementary Table S2: Structures used for MTR3D calculations**

| HGNC Symbol | PDB ID                                          | Source                    |
|-------------|-------------------------------------------------|---------------------------|
| ANKRD11     | 99_339_6by9.1.A_5f76d4ace473290e766cc658.pdb    | SWISS-MODEL               |
| ATP1A2      | 26_1020_4ret.2.A_5f7050908ae8c48a4ab2c2fc.pdb   | SWISS-MODEL               |
| CACNA1A     | 1232_1947_5gjv.1.A_5cc87686732c1ef8ec7488d8.pdb | SWISS-MODEL               |
| CACNA1A     | 3B XK                                           | Experimentally determined |
| CHD2        | 259_1022_3mwy.1.A_5f68031dc60d5f991ca20e5a.pdb  | SWISS-MODEL               |
| CHD2        | 306_990_6ftx.1.M_5f68031dc60d5f991ca20e4a.pdb   | SWISS-MODEL               |
| DNM1        | 6DLU                                            | Experimentally determined |
| DNM1L       | 4BEJ                                            | Experimentally determined |
| DNM1L       | 1_736_5wp9.1.A_5f67078e80434655032fe539.pdb     | SWISS-MODEL               |
| DYNC1H1     | 5NUG                                            | Experimentally determined |
| DYNC1H1     | 1444_4646_5nug.1.A_5f686bb9d903f866a892fff7.pdb | SWISS-MODEL               |
| EEF1A2      | 4_461_6ra9.1.B_5f653e249950e55facbb0951.pdb     | SWISS-MODEL               |
| FGF12       | 4JQ0                                            | Experimentally determined |
| FOXG1       | 184_289_6qvw.1.A_5f65713f55ba95672fbdf47a.pdb   | SWISS-MODEL               |
| GNAO1       | 6OIK                                            | Experimentally determined |
| GNAO1       | 12_349_4gnk.1.A_5f6440dfb61a4ebe2dc96a6f.pdb    | SWISS-MODEL               |
| GRIN1       | 6IRA                                            | Experimentally determined |
| GRIN1       | 25_841_6whs.1.A_5f7061b38ae8c48a4ab396f8.pdb    | SWISS-MODEL               |
| GRIN2A      | 6IRH                                            | Experimentally determined |
| GRIN2A      | 32_840_5iou.1.D_5f705ad68ae8c48a4ab33f3e.pdb    | SWISS-MODEL               |
| GRIN2B      | 5EWM                                            | Experimentally determined |
| GRIN2B      | 34_845_6whs.1.B_5f67d87fadf0a0f8fbc5565a.pdb    | SWISS-MODEL               |
| GRIN2D      | 49_870_5ide.1.C_5f704e0e8ae8c48a4ab29e27.pdb    | SWISS-MODEL               |

|         |                                                  |                           |
|---------|--------------------------------------------------|---------------------------|
| HCN1    | 6UQF                                             | Experimentally determined |
| HCN1    | 94_633_6uqf.1.A_5f7050f98ae8c48a4ab2cb0b.pdb     | SWISS-MODEL               |
| HECW2   | 2LFE                                             | Experimentally determined |
| HECW2   | 1181_1566_5tj7.4.A_5f67e458d6c129eb4b1cdefc.pdb  | SWISS-MODEL               |
| KCNA1   | 32_419_5wie.1.B_5f70502e8ae8c48a4ab2c071.pdb     | SWISS-MODEL               |
| KCNA2   | 31_421_6ebk.1.B_5f6588141a1d1f370635a17f.pdb     | SWISS-MODEL               |
| KCNB1   | 29_424_6ebk.1.B_5f66f816b078d19d780f175d.pdb     | SWISS-MODEL               |
| KCNQ2   | 6FEG                                             | Experimentally determined |
| KCNQ2   | 70_329_7cr1.1.A_5f6d90cc545f5a798b410058.pdb     | SWISS-MODEL               |
| KCNT1   | 71_1200_5u70.1.D_5f7f1ef24ec6d929eac0c96.pdb     | SWISS-MODEL               |
| NACC1   | 4U2N                                             | Experimentally determined |
| NACC1   | 3_124_6w66.1.C_5f65b96d4df9e3a0090caa39.pdb      | SWISS-MODEL               |
| NEDD4L  | 384_969_5xmc.1.A_5f673b25e33774264de5fbed.pdb    | SWISS-MODEL               |
| NEDD4L  | 3JVZ                                             | Experimentally determined |
| NTRK2   | 4AT5                                             | Experimentally determined |
| SCN1A   | 1790_1942_4dck.1.A_5f6816acab0d00685490c2f3.pdb  | SWISS-MODEL               |
| SCN2A   | 6J8E                                             | Experimentally determined |
| SCN2A   | 1788_1929_4j pz.1.B_5e1273f59ffd12a1ae2ee8f2.pdb | SWISS-MODEL               |
| SCN8A   | 1778_1921_4j pz.1.B_5f68131a033d6797c5fb9d45.pdb | SWISS-MODEL               |
| SLC2A1  | 4PYP                                             | Experimentally determined |
| SLC6A1  | 42_576_4xp4.1.A_5f661e539172bfe4f51b18c8.pdb     | SWISS-MODEL               |
| SPTAN1  | 3FB2                                             | Experimentally determined |
| SPTAN1  | 1828_2472_4d1e.1.B_5f6838d52a32a9d4f0792f88.pdb  | SWISS-MODEL               |
| STXBP1  | 3_592_4jeu.1.A_5f6617f21ac1d9a920966478.pdb      | SWISS-MODEL               |
| SYNGAP1 | 252_733_3bxj.2.A_5f70515f8ae8c48a4ab2cf8e.pdb    | SWISS-MODEL               |

---

|       |      |                           |
|-------|------|---------------------------|
| YWHAG | 6BYJ | Experimentally determined |
|-------|------|---------------------------|

**Disclaimer/Publisher's Note:** The statements, opinions and data contained in all publications are solely those of the individual author(s) and contributor(s) and not of MDPI and/or the editor(s). MDPI and/or the editor(s) disclaim responsibility for any injury to people or property resulting from any ideas, methods, instructions or products referred to in the content.
